# Supplementary material
Source: HighWire-hosted journal article supplement (https://bjsm.bmj.com/content/bjsports-2016-097066)
Supplement: inline-supplementary-material-1 [file inline-supplementary-material-1.pdf]

Supplementary Table 2: Risk of bias assessment of RCT studies investigating the effect of FIFA injury prevention programmes

| Bias domain                                                 | FIFA 11        |                          | FIFA 11+        |               |               |                         |
|-------------------------------------------------------------|----------------|--------------------------|-----------------|---------------|---------------|-------------------------|
|                                                             | Steffen (2008) | van Beijsterveldt (2012) | Soligard (2008) | Owoeye (2014) | Hammes (2014) | Silvers-Granelli (2015) |
| Random sequence generation (selection bias)                 | Unclear        | High                     | Unclear         | Unclear       | Unclear       | Low                     |
| Allocation concealment (selection bias)                     | Unclear        | Unclear                  | Unclear         | Unclear       | Unclear       | Unclear                 |
| Blinding of participants and researchers (performance bias) | High           | High                     | High            | High          | High          | High                    |
| Blinding of outcome assessment (detection bias)             | High           | High                     | High            | High          | High          | High                    |
| Incomplete outcome data (attrition bias)                    | Low            | Low                      | High            | Low           | High          | High                    |
| Selective reporting (reporting bias)                        | Low            | Low                      | Low             | Low           | Low           | Unclear                 |
| Other bias                                                  | High           | High                     | Low             | High          | High          | High                    |
